# Supplementary material for: Ultrasoft gelatin aerogels for oil contaminant removal
Source: Royal Society of Chemistry journal article supplement (doi:10.1039/c6ta03146c), 2016-01-01
Supplement: c6ta03146c1.pdf [file c6ta03146c1.pdf]

## Support Information

### Ultrasoft Gelatin Aerogels for Oil Contaminant

#### Removal

Juan Wang, Dan Zhao, Ke Shang, Yu-Tao Wang, Dan-Dan Ye, A-Hui Kang, Wang Liao,\*  
and Yu-Zhong Wang\*

Center for Degradable and Flame-Retardant Polymeric Materials, National Engineering Laboratory of Eco-Friendly Polymeric Materials (Sichuan), State Key Laboratory of Polymer Materials Engineering, College of Chemistry, Sichuan University, Chengdu, 610064, China. \*E-mail: yzwang@scu.edu.cn (Y.-Z. Wang); liaowang@scu.edu.cn (W. Liao).

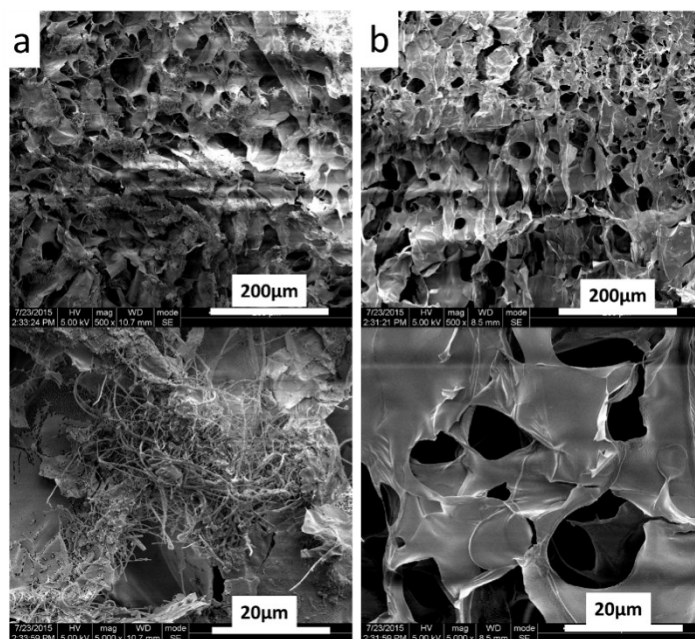

**Fig. S1** SEM photographs of the MTCS-cGels: (a) surface (up) and its zoom-in (down); (b) cryo-fractured surface (up) and its zoom-in (down).

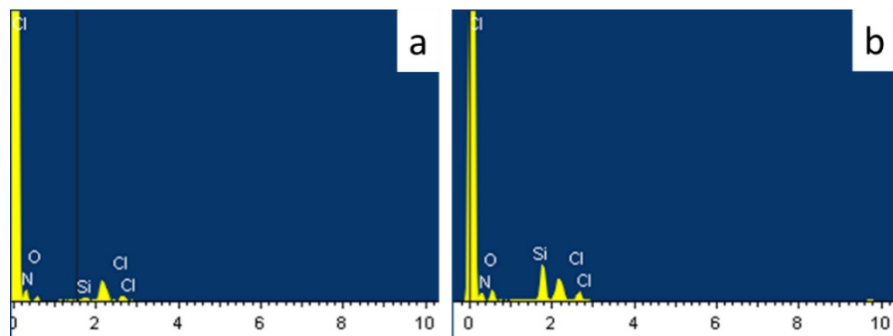

**Fig. S2** EDX spectra of the MTCS-cGel aerogel: cryo-fractured surfaces (a) and outer surface (b).

**Table S1.** The comparison of oil absorbent materials demonstrated in recent years.

| Absorbent Material                 | Production Process                                                                                                                                                             | Absorption Capacity (g/g)                                       | Reusability and Method                             | Renewability | Biodegradability | Ref |
|------------------------------------|--------------------------------------------------------------------------------------------------------------------------------------------------------------------------------|-----------------------------------------------------------------|----------------------------------------------------|--------------|------------------|-----|
| PS/PU Fibers                       | 1. Dissolving PS and diluting PU resin<br>2. Electrospinning                                                                                                                   | Motor oil~64                                                    | Squeezing:<br>Motor oil~60% after 5 cycles         | N            | N                | 20  |
| TiO <sub>2</sub> -coated PU Sponge | 1.Initial PU sponge soaking in TiO <sub>2</sub> sol<br>2.Centrifugation and drying                                                                                             | Motor oil~105<br>Gasoline~103<br>Diesel~87.4<br>Crude oil~114.9 | Squeezing:<br>Motor oil ~75% after 12 cycles       | N            | N                | 17  |
| Hydrophobic PU Sponge              | 1.PU sponges were ultrasonically cleaned in acetone and ethanol<br>2.Immersing PU sponge in MTCS/hexane solution and drying                                                    | Crude oil~24<br>Gasoline~16                                     | None                                               | N            | N                | 18  |
| Silanized Melamine Sponges         | 1. Silanization of commercial melamine sponge by immersing in a octadecyltrichlorosilane/toluene solution<br>2. Fresh toluene washing by sorption-squeezing process and drying | Chloroform~163<br>Toluene~96.2<br>Diesel~93.6                   | Squeezing:<br>Diesel~93.4 % after 100 cycles       | N            | N                | 42  |
| Superhydrophobic MF Sponge         | 1.Depositing of a thin layer of polydopamine (PDA) films on MF sponge<br>2.Immersion of the PDA-coated MF sponge into an (1H,1H,2H,2H-perfluorodecanethiol)/ethanolic solution | Chloroform~195<br>n-hexane~79<br>Cyclohexane~94<br>Pump oil~90  | Squeezing:<br>Cyclohexane ~91% after 100 cycles    | N            | N                | 23  |
| Bacterial Cellulose Aerogels       | 1.Bacterial Cellulose<br>2.Freeze-drying<br>3.Hydrophobic modification in                                                                                                      | Gasoline~95<br>Paraffin oil~95<br>Chloroform~180                | Compression -rinsing- freeze drying<br>Diesel~100% | Y            | Y                | 33  |

|                                           |                                                                                                                                                                                                                                                        |                                                                 |                                                                                    |   |   |    |
|-------------------------------------------|--------------------------------------------------------------------------------------------------------------------------------------------------------------------------------------------------------------------------------------------------------|-----------------------------------------------------------------|------------------------------------------------------------------------------------|---|---|----|
|                                           | MTCS/CH <sub>2</sub> Cl <sub>2</sub>                                                                                                                                                                                                                   |                                                                 | after 10 cycles                                                                    |   |   |    |
| Nanofibrillated Cellulose Aerogel         | <ol style="list-style-type: none"> <li>1. Homogenized with an inline Ultra-Turrax system</li> <li>2. Fibrillation</li> <li>3. Centrifugation</li> <li>4. Silylated NFC by mixing NFC and polysiloxane sol ( MTMS)</li> <li>5. Freeze-drying</li> </ol> | Dodecane~55<br>Chloroform~100<br>Silicon oil~70<br>Motor oil~50 | Rinsing-freeze drying<br>Dodecane~90% after 10 cycles                              | Y | Y | 34 |
| Nanocellulose Aerogels                    | <ol style="list-style-type: none"> <li>1. Hardwood kraft pulp mechanically homogenized to form Nanocellulose hydrogel</li> <li>2. Freeze-drying</li> <li>3. Coated with TiO<sub>2</sub> using atomic layer deposition</li> </ol>                       | Chloroform~40<br>Paraffin oil~27<br>Octane~22                   | Drying:<br>Toluen~100% after 10 cycles                                             | Y | Y | 32 |
| Nanofibrillated Cellulose Aerogel         | <ol style="list-style-type: none"> <li>1. Chemical treatments</li> <li>2. High-intensity ultrasonication</li> <li>3. Freeze-drying</li> <li>4. Hydrophobic coating by MTCS (CVD)</li> </ol>                                                            | Oil~52                                                          | None                                                                               | Y | Y | 36 |
| Cellulose Nanofibril Aerogels             | <ol style="list-style-type: none"> <li>1. Cellulose isolated from rice straw</li> <li>2. TEMPO oxidation</li> <li>3. Defibrillation</li> <li>4. Freeze-drying</li> <li>5. Hydrophobic coating by triethoxyl(octyl) silane (CVD)</li> </ol>             | Chloroform~356<br>Decane~219<br>Pump oil~230                    | Distillation:<br>Toluen~48%,<br>Octane~61%,<br>Cyclohexane ~57%,<br>after 6 cycles | Y | Y | 35 |
| Microfibrillated Cellulose Fibers Aerogel | <ol style="list-style-type: none"> <li>1. Separation into individual cellulose fibers by deflaker</li> <li>2. Microfibrillation of cellulose fibers</li> <li>3. Freeze-drying</li> <li>4. Hydrophobic coating by MTMS</li> </ol>                       | pump oil~197,<br>motor oil~198<br>silicone oil~228              | Squeezing"<br>Pump oil 61% after 30 cycles                                         | Y | Y | 37 |

|                                     |                                                                                                                                                                                                                                                                                              |                                                                                  |                                                                                                                                                                                                   |   |   |    |
|-------------------------------------|----------------------------------------------------------------------------------------------------------------------------------------------------------------------------------------------------------------------------------------------------------------------------------------------|----------------------------------------------------------------------------------|---------------------------------------------------------------------------------------------------------------------------------------------------------------------------------------------------|---|---|----|
|                                     | (CVD)                                                                                                                                                                                                                                                                                        |                                                                                  |                                                                                                                                                                                                   |   |   |    |
| PVA/CNF<br>Aerogel                  | <ol style="list-style-type: none"> <li>1. TEMPO-oxidation</li> <li>2. Refining in a disk refiner and centrifugation</li> <li>3. Microfluidization</li> <li>4. Preparation of crosslinked PVA/CNF aerogels</li> <li>5. Freeze-drying</li> <li>6. Hydrophobic coating by MTCS (CVD)</li> </ol> | <p>Gasoline~45</p> <p>Crude oil~64</p> <p>Chloroform~95</p>                      | None                                                                                                                                                                                              | Y | Y | 31 |
| Chitin<br>Aerogel                   | <ol style="list-style-type: none"> <li>1. Dissolving chitin in NaOH/urea aqueous by using freezing/thawing cycles</li> <li>2. Cross-linking by epichlorohydrin</li> <li>3. Freeze-drying</li> <li>4. Hydrophobic coating by MTCS (CVD)</li> </ol>                                            | <p>Gasoline~30</p> <p>Chloroform~58</p> <p>Pump oil~37</p>                       | <p>Rinsing-<br/>vacuum<br/>drying</p> <p>Toluene~93<br/>% after 10<br/>cycles</p>                                                                                                                 | Y | Y | 38 |
| Carbon<br>Soot<br>Sponge            | <ol style="list-style-type: none"> <li>1. Synthesis of carbon soot (CS) combustion flame process</li> <li>2. Preparation of CS-sponge by dip-coating of melamine sponge in the CS dispersion</li> </ol>                                                                                      | <p>Toluene~50</p> <p>Crude oil~30</p> <p>Used pump oil~34</p> <p>Pump oil~36</p> | <p>Rinsing-<br/>drying:</p> <p>Pump<br/>oil~94% after<br/>10 cycles,<br/>~87% after<br/>20 cycles;</p> <p>Squeezing:</p> <p>Pump<br/>oil~37% after<br/>2 cycles,<br/>~28% after 4<br/>cycles.</p> | N | N | 24 |
| Nitrogen-Rich<br>Carbon<br>Aerogels | <ol style="list-style-type: none"> <li>1. Preparation of Lignin Particles</li> <li>2. MF Prepolymer Monomers (pre-MF)</li> <li>3. Porous PMF aerogels</li> </ol>                                                                                                                             | <p>Chloroform~12.5</p> <p>Gasoline~7</p> <p>Pump oil~7.5</p>                     | <p>Distillation:</p> <p>n-<br/>hexane~100<br/>% after 100<br/>cycles;</p>                                                                                                                         | N | N | 6  |

|                                   |                                                                                                                                                                                                                                         |                                             |                                                                                              |   |   |    |
|-----------------------------------|-----------------------------------------------------------------------------------------------------------------------------------------------------------------------------------------------------------------------------------------|---------------------------------------------|----------------------------------------------------------------------------------------------|---|---|----|
|                                   | 4. NRC Aerogels by complete pyrolysis                                                                                                                                                                                                   |                                             | Combustion:<br>n-hexadecane<br>~65% after 100 cycles.                                        |   |   |    |
| BC/rGO Aerogels                   | 1. biosynthesis bacterial cellulose (BC)<br>2. Fibrillation of BC and ultrasonication<br>3. Synthesis of GO<br>4. mixing BC suspension with GO suspension and ultrasonication, freeze-drying<br>4. reducing at 200 °C under a H2 stream | DMF~136<br>Cyclohexane~150                  | None                                                                                         | N | N | 30 |
| Carbon Nanofiber Aerogels from BC | 1. purified BC pellicles were rinsed and freeze-drying<br>2. pyrolysis at 700–1300oC under argon atmosphere                                                                                                                             | Gasoline~180<br>Chloroform~285              | Combustion:<br>Gasolin~59% after 5 cycles;<br>Distillation:<br>1-octane~100% after 5 cycles; | Y | N | 7  |
| Graphene-based Aerogels           | 1. Preparation of GO<br>2. Preparation of Cu nanoparticles<br>3. graphene-based hydrogels<br>4. freeze-drying                                                                                                                           | Pump oil~31<br>Diesel oil~34                | None                                                                                         | N | N | 27 |
| Spongy Graphene                   | 1. Preparation of GO<br>2. hydrothermal treatment of colloidal GO dispersion to prepare graphene gel<br>3. freeze-drying                                                                                                                | Chloroform~85<br>Kerosene~45<br>Pump oil~77 | Heat treatment:<br>Toluene~98% after 10 cycles;<br>Dodecane~9                                | N | N | 5  |

|                                   |                                                                                                                                                                                                                                                                                  |                                                                                                       |                                                                                                                 |   |   |    |
|-----------------------------------|----------------------------------------------------------------------------------------------------------------------------------------------------------------------------------------------------------------------------------------------------------------------------------|-------------------------------------------------------------------------------------------------------|-----------------------------------------------------------------------------------------------------------------|---|---|----|
|                                   |                                                                                                                                                                                                                                                                                  |                                                                                                       | 3% after 10 cycles.                                                                                             |   |   |    |
| Graphene-based Sponges            | <p>1. hydrophobic graphene nanosheets were obtained by exfoliation of expanded graphite</p> <p>2. commercial sponge was cleaned ultrasonically with acetone and distilled water successively and dried</p> <p>3. dipping into a dispersion of graphene nanosheets in ethanol</p> | <p>Chloroform~165</p> <p>Hexane~54</p> <p>Pump oil~92</p> <p>Used pump oil~87</p> <p>Motor oil~92</p> | <p>Squeezing:</p> <p>Motor oil~30% after 2 cycles</p>                                                           | N | N | 28 |
| Nitrogen-Doped Graphene Framework | <p>1.oxidation of the natural graphite powder using a modified Hummers method</p> <p>2. preparation of ultralight N-doped Graphene gel in autoclave</p> <p>3. freeze-dried graphene gel</p> <p>4. heating at 1050 °C for 3h under Ar atmosphere</p>                              | <p>Cyclohexane~320</p> <p>Chloroform~500</p> <p>Gasoline~280</p>                                      | N                                                                                                               | N | N | 29 |
| CNT Sponge                        | <p>1. The CNT sponges were prepared by chemical vapor deposition (CVD)</p>                                                                                                                                                                                                       | <p>Diesel oil~112</p> <p>Octane~108</p>                                                               | <p>Burning:</p> <p>Diesel oil~36% after 10 cycles;</p> <p>Squeezing:</p> <p>Diesel oil~18% after 10 cycles.</p> | N | N | 8  |
| 3D Graphene/CNT Hybrid Foam       | <p>1.growing graphene on nickel (Ni) foam</p> <p>2. the graphene–Ni substrate is immersed into polyethylene glycol/ethanol solution Ni(NO<sub>3</sub>)<sub>2</sub> and dried</p>                                                                                                 | <p>Chloroform~105</p> <p>Toluen~125</p>                                                               | <p>Rinsing-drying:</p> <p>Toluen~82% after 6 cycles.</p>                                                        | N | N | 4  |

|                          |                                                                                                                   |                                                                                                                                                                                                |                                                                              |   |   |          |
|--------------------------|-------------------------------------------------------------------------------------------------------------------|------------------------------------------------------------------------------------------------------------------------------------------------------------------------------------------------|------------------------------------------------------------------------------|---|---|----------|
|                          | <p>3. CNTs are CVD-grown at 750 1C</p> <p>4. Ni foam was etched away to obtain 3D graphene-CNT hybrid foam</p>    |                                                                                                                                                                                                |                                                                              |   |   |          |
| Hydrophobic cGel aerogel | <p>1. Gelatin crosslinked by formaldehyde</p> <p>2. Freeze drying</p> <p>3. Hydrophobic coating by MTCS (CVD)</p> | <p>Crude oil~70</p> <p>Gasoline~81</p> <p>Keresene~83</p> <p>Silicon oil~118</p> <p>Pump oil~119</p> <p>Waste pump oil~105</p> <p>Paraffin oil~92</p> <p>Toluene~107</p> <p>Chloroform~123</p> | <p>Compression :</p> <p>83% after Compression in kerosene for 5000 times</p> | Y | Y | Our work |
